# Supplementary material for: Perceived Parental Attitudes Are Indirectly Associated with Consumption of Junk Foods and Sugar-Sweetened Beverages among Chinese Adolescents through Home Food Environment and Autonomous Motivation: A Path Analysis
Source: MDPI journal article supplement (doi:10.3390/nu13103403), 2021-09-27
Supplement: s1 [file s1]

**Table S1.** Measures of Junk Food/Sugar-Sweetened Beverage Consumption, Perceived Parental Attitudes, Home Food Environment and Autonomous Motivation.

|                                                                                                                                                                                                                                                      | Items                                                                                                                                                                                                                                                                                                                    | Response options                                                                                                                                                                                                                                                     | Scoring       |
|------------------------------------------------------------------------------------------------------------------------------------------------------------------------------------------------------------------------------------------------------|--------------------------------------------------------------------------------------------------------------------------------------------------------------------------------------------------------------------------------------------------------------------------------------------------------------------------|----------------------------------------------------------------------------------------------------------------------------------------------------------------------------------------------------------------------------------------------------------------------|---------------|
| JF consumption                                                                                                                                                                                                                                       | How many times did you eat the following foods during the past 7 days?                                                                                                                                                                                                                                                   |                                                                                                                                                                                                                                                                      |               |
|                                                                                                                                                                                                                                                      | a. Fried potatoes.<br>b. Candy or chocolate.<br>c. Cookies, cakes, cupcakes, doughnuts, brownies, pop-tarts<br>d. Ice cream or other frozen desserts.<br>e. Regular potato chips, corn chips or cheese puffs<br>f. Sugary cereals.                                                                                       | Never = 0, 1 – 3 times in the past 7 days = 0.3, 4 – 6 times in the past 7 days = 0.7, 1 time per day = 1, 2 times per day = 2, 3 or more times per day = 3.                                                                                                         | Total score   |
| SSB consumption                                                                                                                                                                                                                                      | How many times did you consume the following drinks during the past 7 days?                                                                                                                                                                                                                                              |                                                                                                                                                                                                                                                                      |               |
|                                                                                                                                                                                                                                                      | a. Sweetened fruit drinks and teas.<br>b. Regular soda.<br>c. Energy drinks                                                                                                                                                                                                                                              | Never = 0, 1 – 3 times in the past 7 days = 0.3, 4 – 6 times in the past 7 days = 0.7, 1 time per day = 1, 2 times per day = 2, 3 or more times per day = 3.                                                                                                         | Total score   |
| Perceived parental attitudes<br>("PARENT" means the adult who takes care of you. It could be your birth mother or father or your adopted mother or father. It could also be your guardian, and adult relative or an adult who isn't related to you.) | What your parent(s) say or do when it comes to eating JFs or drinking SSBs?                                                                                                                                                                                                                                              |                                                                                                                                                                                                                                                                      |               |
|                                                                                                                                                                                                                                                      | a. If I've had a bad day, my parent(s) let me have JFs or SSBs to make me feel better.<br>b. My parent(s) don't buy a lot of JFs or SSBs for me.<br>c. My parent(s) try to avoid eating JFs or drinking SSBs when I'm around.<br>d. My parent(s) have to make sure that I don't eat too much JFs or drink too much SSBs. | Strongly disagree = 5,<br>Somewhat disagree = 4,<br>Neither disagree nor agree = 3, Somewhat agree = 2,<br>Strongly agree = 1.<br><br>Strongly disagree = 1,<br>Somewhat disagree = 2,<br>Neither disagree nor agree = 3, Somewhat agree = 4,<br>Strongly agree = 5. | Average score |
| JF availability in home environment                                                                                                                                                                                                                  | How often are the following foods available in your home?                                                                                                                                                                                                                                                                |                                                                                                                                                                                                                                                                      |               |
|                                                                                                                                                                                                                                                      | a. Sweets like candy, cookies, cake, ice cream, etc.<br>b. Regular potato chips, corn chips or cheese puffs                                                                                                                                                                                                              | Never = 1, Rarely = 2,<br>Sometimes = 3, Often = 4,<br>Always = 5.                                                                                                                                                                                                   | Average score |
| SSB availability in home environment                                                                                                                                                                                                                 | How often are the following drinks available in your home?                                                                                                                                                                                                                                                               |                                                                                                                                                                                                                                                                      |               |
|                                                                                                                                                                                                                                                      | a. Sugary drinks like regular soda, sports drinks, fruit drinks, sweetened teas and other drinks with added sugar                                                                                                                                                                                                        | Never = 1, Rarely = 2,<br>Sometimes = 3, Often = 4,<br>Always = 5.                                                                                                                                                                                                   |               |
| Autonomous motivation                                                                                                                                                                                                                                | There are lots of reasons why people might limit the amount of JFs and SSBs they have. Please                                                                                                                                                                                                                            | Strongly disagree = 1,<br>Somewhat disagree = 2,<br>Neither disagree nor agree =                                                                                                                                                                                     | Average score |

---

select how much you disagree or  
agree with?

3, Somewhat agree = 4,  
Strongly agree = 5.

a. I have thought about it and  
decided that I want to limit JFs  
and SSBs.

b. It's an important thing for me to  
do.

---

JF, junk food; SSB, sugar-sweetened beverage.
